# Supplementary material
Source: PubMed Central journal article supplement (PMC10478167)
Supplement: NIHMS1869896-supplement-Supplementary_materials.pdf [file NIHMS1869896-supplement-Supplementary_materials.pdf]

**Supplementary tables and figures:** CD44 thioaptamer targeted liposomes augment protective immune responses against *Mycobacterium tuberculosis* infection ex vivo and in vivo

**Table ST1. Primers used for qPCR assays**

| <b>GENE</b>    | <b>Forward primer 5'-&gt;3'</b> | <b>Reverse primer 5'-&gt;3'</b> |
|----------------|---------------------------------|---------------------------------|
| $\beta$ -Actin | CATTGCTGACAGGATGCAGAAGG         | TGCTGGAAGGTGGACAGTGAGG          |
| GAPDH          | CATCACTGCCACCCAGAAGACTG         | ATGCCAGTGAGCTTCCCGTTCAG         |
| ATG5           | TTTGCATCACCTCTGCTTTC            | TAGGCCAAAGGTTTTCAGCTT           |
| ATG7           | CGTTGCCACAGCATCATCTTC           | CACTGAGGTTCCACCATCCTTGG         |
| RAB7           | GAGCGGACTTTCTGACCAAGGA          | CAATCTGCACCTCTGTAGAAGGC         |
| LAMP1          | CCAGGCTTTCAAGGTGGACAGT          | GGTAGGCAATGAGGACGATGAG          |

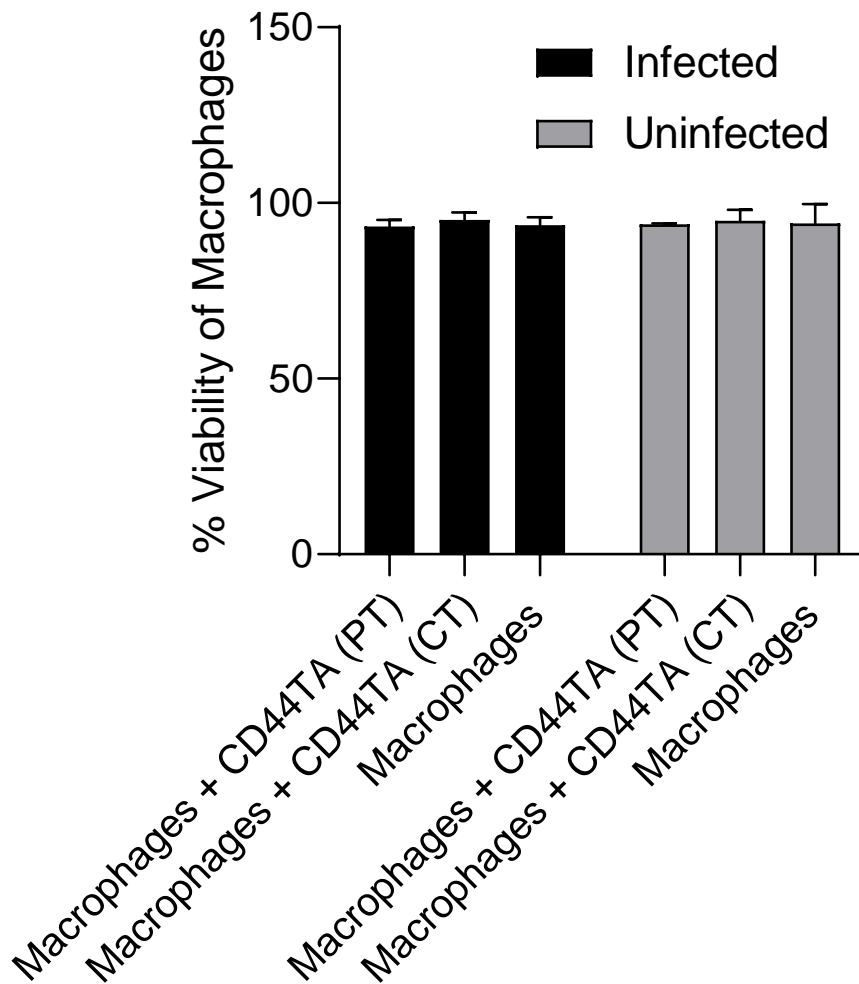

**Figure SF1:**

Effect of CD44TA-LIP treatment on cell viability of *M. tuberculosis* infected and uninfected macrophages. Cell viability was determined by alamarBlue assay after 3 days post CD44TA-LIP treatment/*M. tuberculosis* infection. Data represent average of two independent experiments carried out in duplicate. Bars and error bars represent mean and SD, respectively. PT: pre-treatment; CT: concurrent treatment.

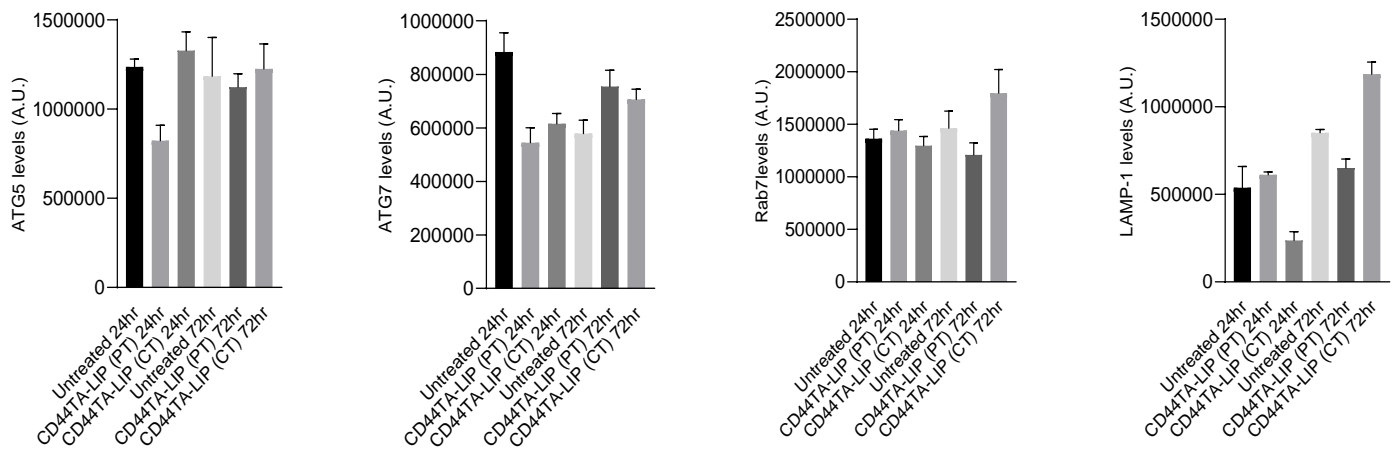

**Figure SF2**

Quantitation of ATG5, ATG7, Rab7 and LAMP1 levels in *M. tuberculosis* infected macrophages with and without CD44TA-LIP treatment (area under each peak; arbitrary units [A.U.]) for panel Fig samples. (Representative data from 1 of 2 similar experiments shown). PT: pre-treatment; CT: concurrent treatment.

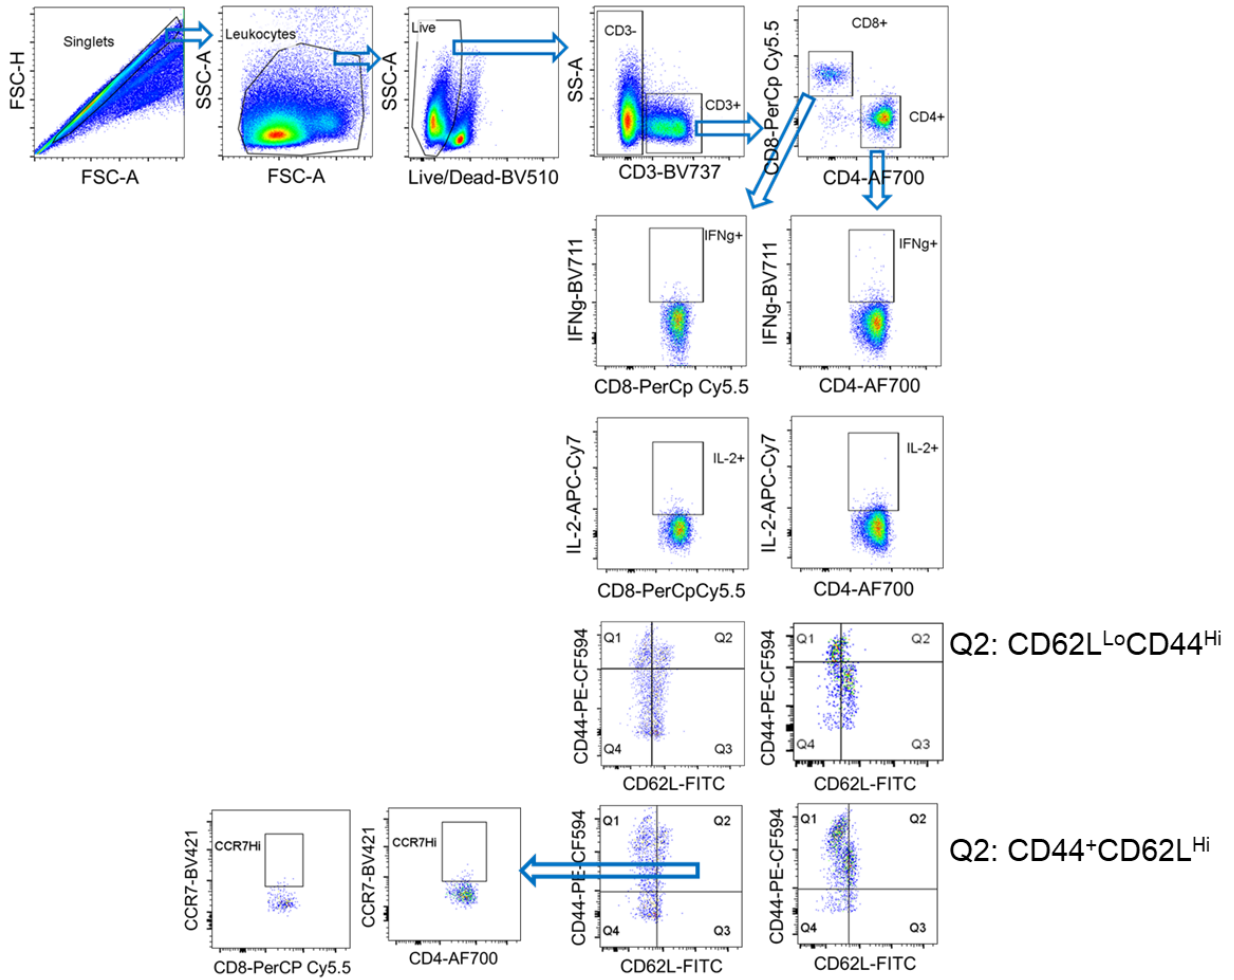

**Figure SF3**

Gating strategy utilized to analyze the levels CD4/CD8 cells producing IFN-g and IL-2, TEM and TCM from the lung and spleen of mice.
